# Supplementary material for: Unravelling the Diversity of Grapevine Microbiome
Source: PLoS One. 2014 Jan 16;9(1):e85622. doi: 10.1371/journal.pone.0085622 (PMC3894198; doi:10.1371/journal.pone.0085622)
Supplement: Table S3 — Active elements of chemical treatments. Chemical treatments calendar with their respective active elements. The interval of application of such chemical treatment is also shown. (XLSX) [file pone.0085622.s010.xlsx]

## Sheet: Folha1
Chemical treatment application	Order of chemical treatment	Active element	Interval of chemical treatment application	Obs
2010-05-14	1st treatment	7,3 %(p/p) of azoxystrobin and 39,2% (p/p) of folpet	Between T1 and T2
2010-05-28	2nd treatment	40% (p/p) of folpet, 5% (p/p) of metalaxyl-M and 80% (p/p) of sulfur	Between T3 and T4	Combination of chemical products
2010-06-14	3rd treatment	40% (p/p) of folpet, 5% (p/p) of metalaxyl-M and 10,5% (p/p) of penconazol	Between T5 and T6	Combination of chemical products
2010-07-02	4th treatment	40% (p/p) of folpet, 5% (p/p) of metalaxyl-M, 10,5% (p/p) of penconazol and 25% (p/p) of thiamethoxam	Between T7 and T8	Combination of chemical products
2010-07-19	5th treatment	4% (p/p) of cimoxanil, 40% (p/p) of copper, 18,2% (p/p) of boscalid and 9.1% (p/p) of kresoxim methyl	Between T9 and T10	Combination of chemical products
